# Supplementary material for: From 3D interpenetrated polythreading to 3D non-interpenetrated polythreading: SBU modulation in a dual-ligand system
Source: Royal Society of Chemistry journal article supplement (doi:10.1039/c3ce42050g), 2013-11-07
Supplement: c3ce42050g.pdf [file c3ce42050g.pdf]

## Supporting Information

### General methods

Bis(4-pyridylmethyl)piperazine (bpmp) was prepared via a published procedure.<sup>1</sup> The remaining starting materials used in these synthetic reactions are purchased commercially and were used as obtained from the supplier. The power X-ray diffraction (PXRD) patterns were collected by a RIGAKU DMAX2500 X-ray diffractometer with Cu K $\alpha$  radiation ( $\lambda=0.154$  nm). The FT-IR spectra were obtained on a Nicolet Nexus FT-IR spectrometer in the range of 650–4000 cm<sup>-1</sup>. Elemental analysis for C, H, N was performed on a German Elementary Vario EL III instrument. Thermogravimetric analysis was recorded on a NETZSCH STA 449C unit with a heating rate of 10°C · min<sup>-1</sup> in nitrogen atmosphere. Magnetic susceptibility data were measured using a Quantum Design MPMS-XL5 SQUID magnetometer.

### Preparation of [Co<sub>4</sub>(sdb)<sub>4</sub>(bpmp)<sub>3</sub>(H<sub>2</sub>O)<sub>4</sub>] $\cdot$ 2H<sub>2</sub>O (**1**)

Cobalt(II) nitrate hexahydrate (58 mg, 0.2 mmol), H<sub>2</sub>sdb (31 mg, 0.1 mmol) and bpmp (54 mg, 0.2 mmol) were placed into 8 mL of distilled H<sub>2</sub>O in a Teflon-lined 23 mL steel autoclave. The autoclave was sealed and heated at 120 °C for 72 h, and then cooled to 25 °C for 24 h. Red blocks of **1** (43% yield based on Co) were isolated after washing with distilled water and drying in air. Anal. Calcd for C<sub>52</sub>H<sub>52</sub>Co<sub>2</sub>N<sub>6</sub>O<sub>15</sub>S<sub>2</sub> **1**: C, 52.79; H, 4.43; N, 7.10. Found: C, 52.72; H, 4.39; N, 7.06%. Selected IR data: 2988 (s), 2900 (s), 1636(m), 1560 (w), 1394 (s), 879 (m), 780(w).

### Preparation of [Cd<sub>4</sub>(sdb)<sub>4</sub>(bpmp)<sub>3</sub>] (**2**)

Cadmium(II) nitrate tetrahydrate (62 mg, 0.2 mmol), H<sub>2</sub>sdb (31 mg, 0.1 mmol) and bpmp (54 mg, 0.2 mmol) were placed into 8 mL of distilled H<sub>2</sub>O in a Teflon-lined 23 mL steel autoclave. The autoclave was sealed and heated at 120 °C for 72 h, and then cooled to 25 °C for 24 h. Yellow blocks of **2** (39% yield based on Cd) were isolated after washing with distilled water and drying in air. Anal. Calcd for C<sub>52</sub>H<sub>46</sub>Cd<sub>2</sub>N<sub>6</sub>O<sub>12</sub>S<sub>2</sub> **2**: C, 50.53; H, 3.75; N, 6.80. Found: C, 50.58; H, 3.72; N, 6.75. Selected IR data: 1624 (s), 1560 (m), 1400 (s), 1323(m), 1162 (s), 779 (m).

## X-Ray crystallography

Diffraction data for **1** and **2** were collected on a Rigaku Mercury CCD and SuperNova, Dual, Mo at zero, Atlas diffractometers respectively. The structures were solved using direct methods and refined on  $F^2$  using SHELXTL<sup>2</sup>. All nonhydrogen atoms were refined anisotropically. Hydrogen atoms bound to carbon atoms were placed in calculated positions and refined isotropically with a riding model. Hydrogen atoms of the water molecules were found in the electron density map and refined by riding. Selected bond distances and angles of the **1-2** are listed in Table S1.

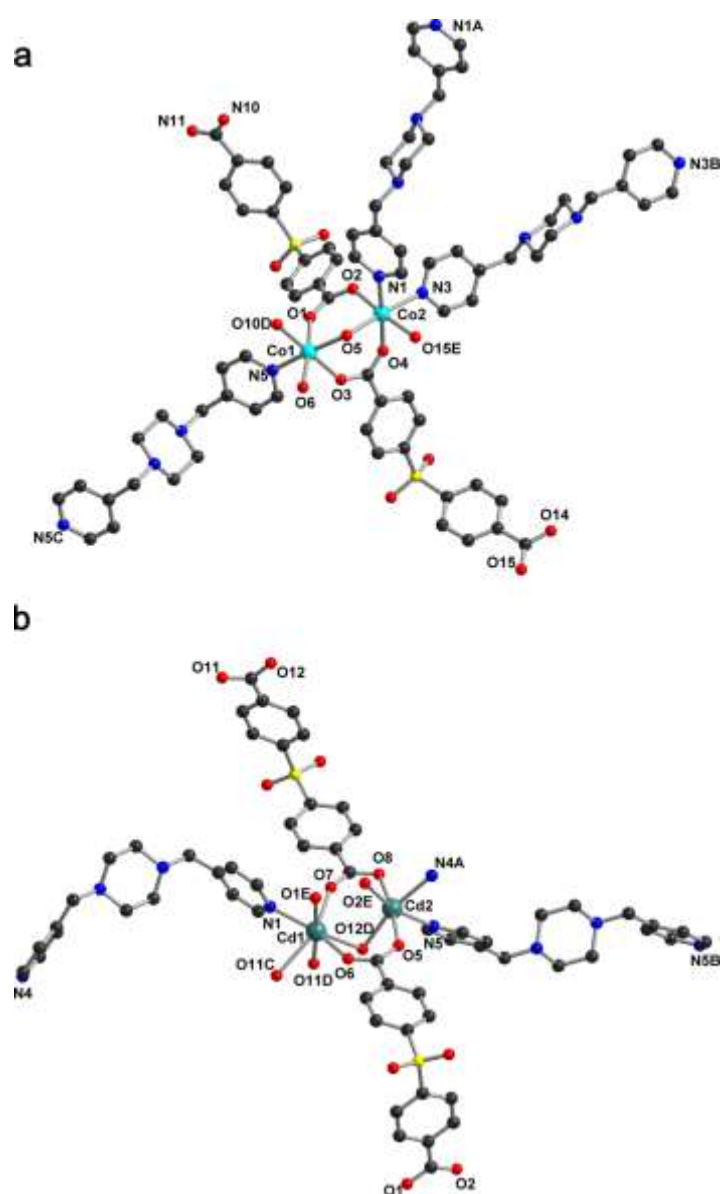

Fig. S1 Coordination environments of **1** (a) and **2** (b).

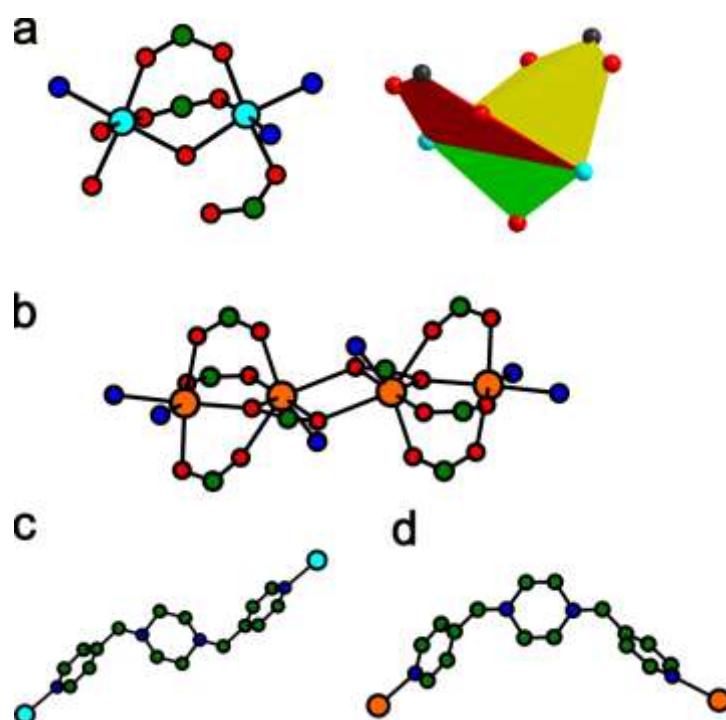

Fig.S2 a  $\{\text{Co}(\text{COO})_2\text{H}_2\text{O}\}$  three-bladed paddlewheel SBU (left) and its schematic perspective (right) in **1**; b doubled paddlewheel SBU in **2**; c trans conformation of bimp in **1**; d cis conformation of bimp in **2** (cobalt, turquoise; carbon, black; oxygen, red).

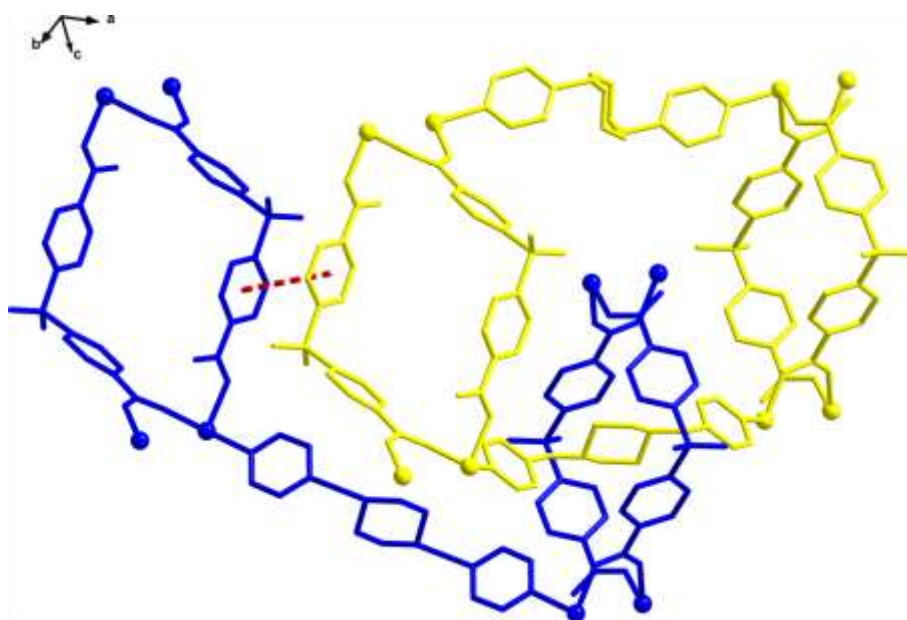

Fig. S3 The  $\pi \cdots \pi$  interactions (the red dotted lines) between the  $\text{sdb}^{2-}$  rings from different sets of frameworks in **1**.

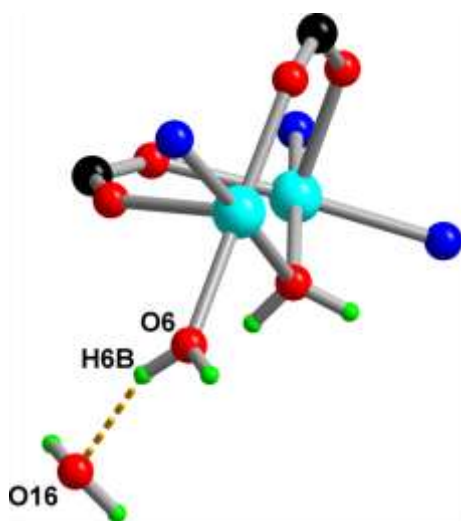

Fig. S4 H bond (the yellow dotted lines) between aqua ligand and free water molecule in **1**. ( $d(\text{O6}\dots\text{H6B}) = 0.83\text{\AA}$ ,  $\angle\text{O6-H6B-O16} = 158^\circ$ ,  $d(\text{H6B}\dots\text{O16}) = 1.97\text{\AA}$ ) (cobalt, turquoise; carbon, black; oxygen, red; hydrogen, green; nitrogen, blue)

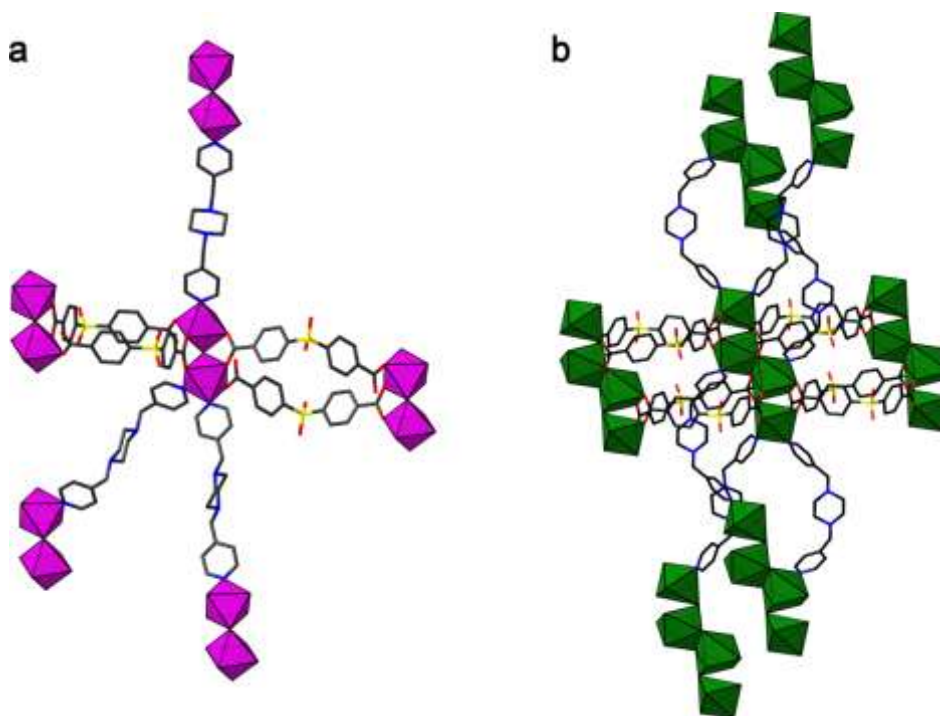

Fig. S5 a  $\text{Co}_2$  clusters in **1** as five-connected nodes; b  $\text{Cd}_4$  clusters in **2** as six-connected nodes.

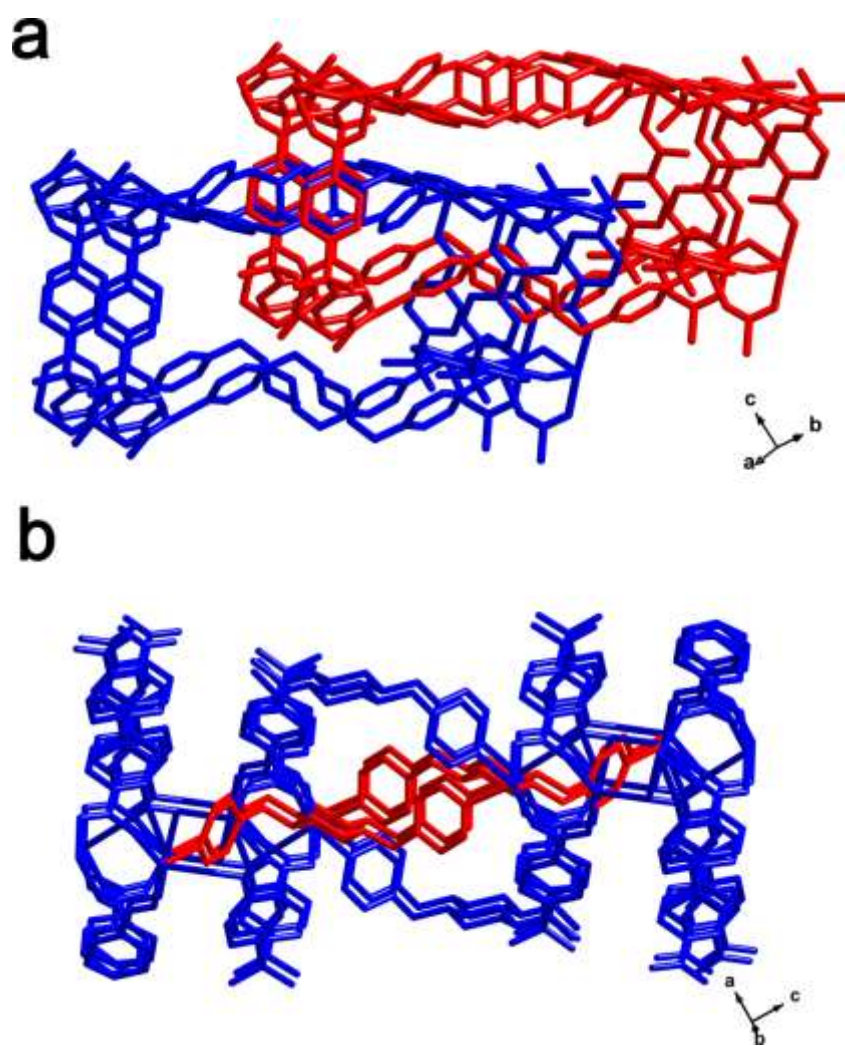

Fig.S6 (a) 2-fold interpenetration in **1**; (b) self-threading like motif in noninterpenetrated framework in **2**.

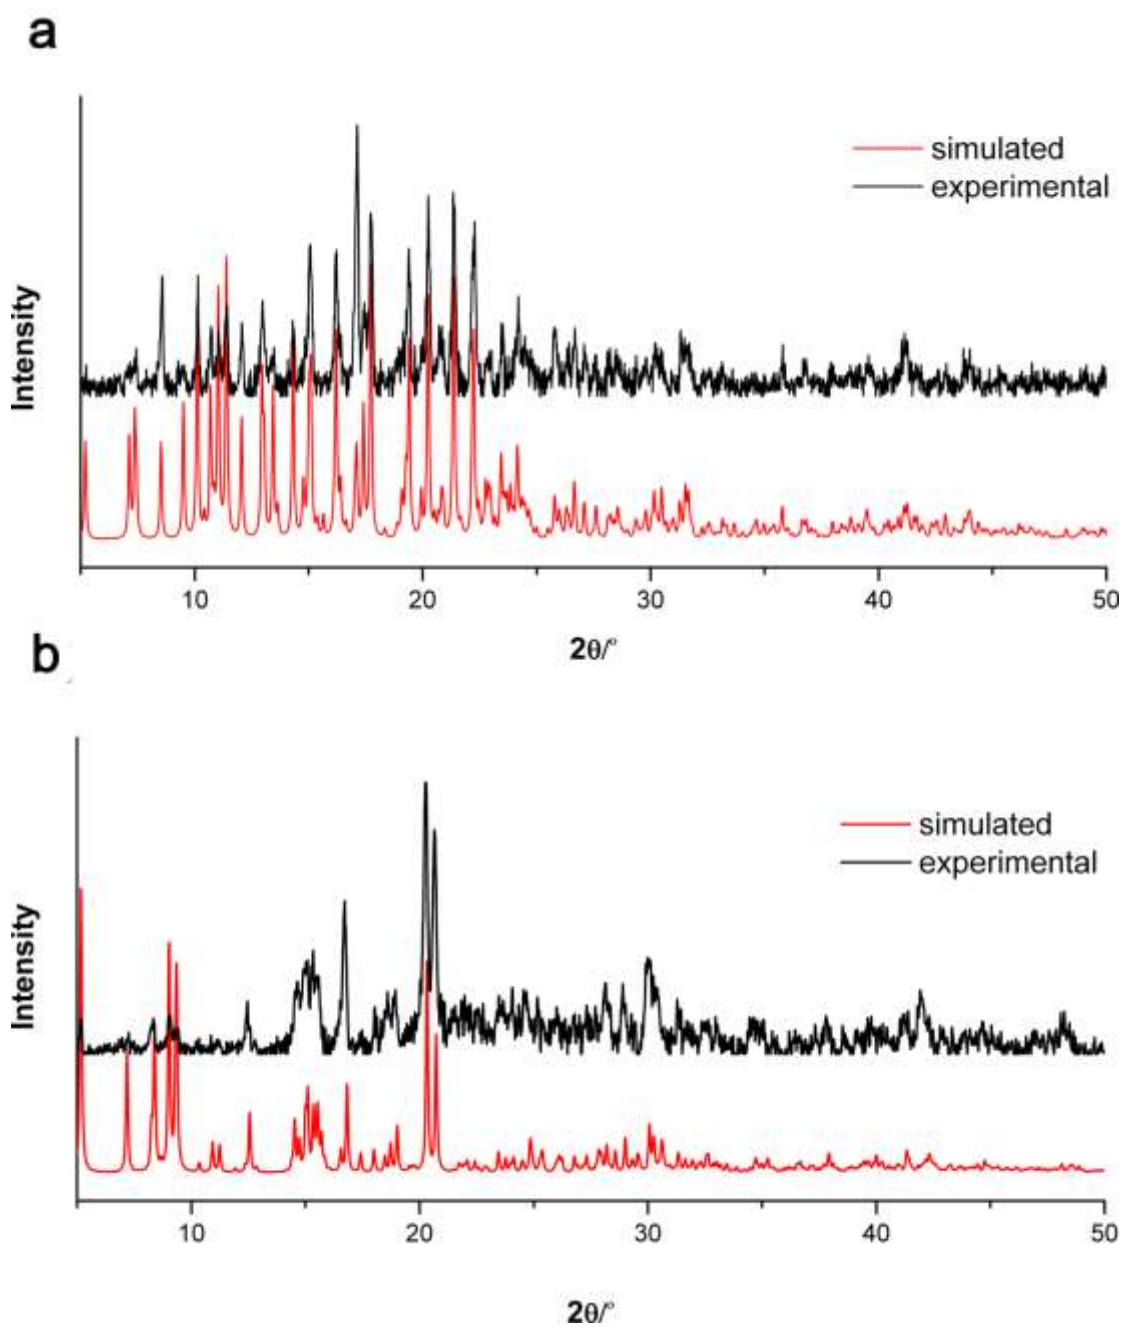

Fig. S7 PXR D patterns of **1(a)** and **2(b)**.

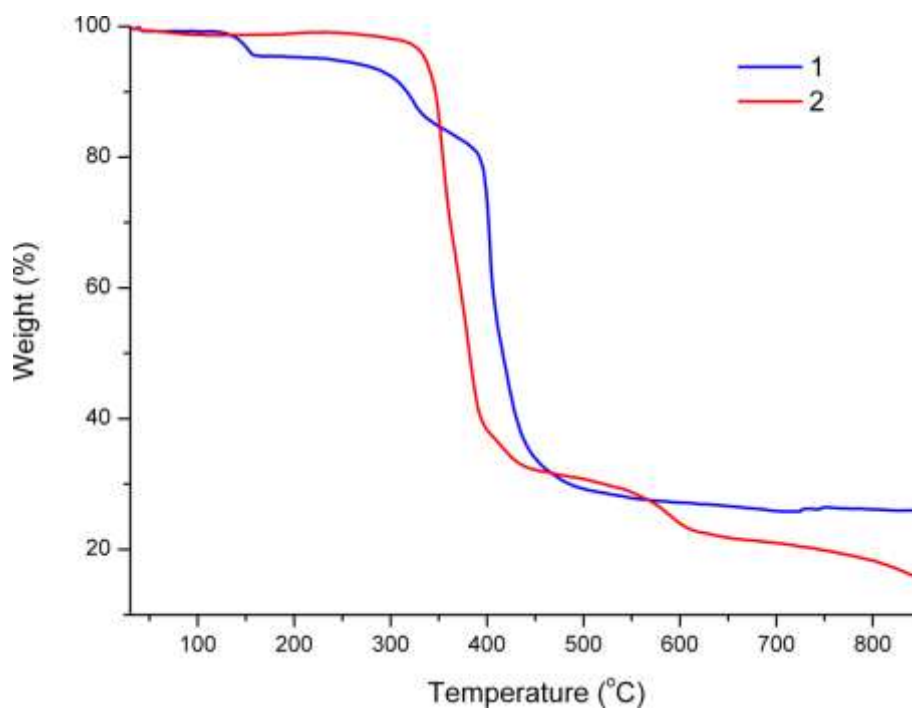

Fig. S8 Thermal gravimetric curves for **1** and **2**.

**1** lost its water solvent and aqua ligands between 120 and 160 °C (4.6% calculated, 4.5% observed), and then the framework undergoes decomposition.

**2** underwent no obvious weight loss before 320 °C, and the compound decomposes rapidly on further heating.

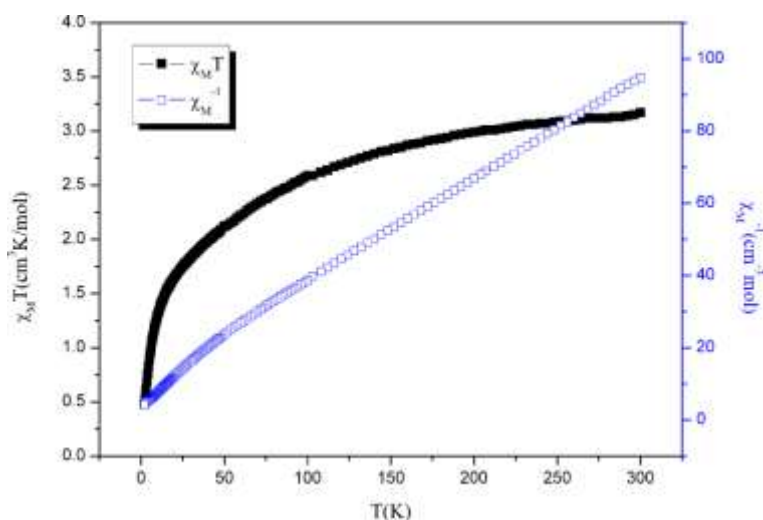

Fig. S9 The temperature dependence of  $\chi_M T$  at 1 kOe for **1**.

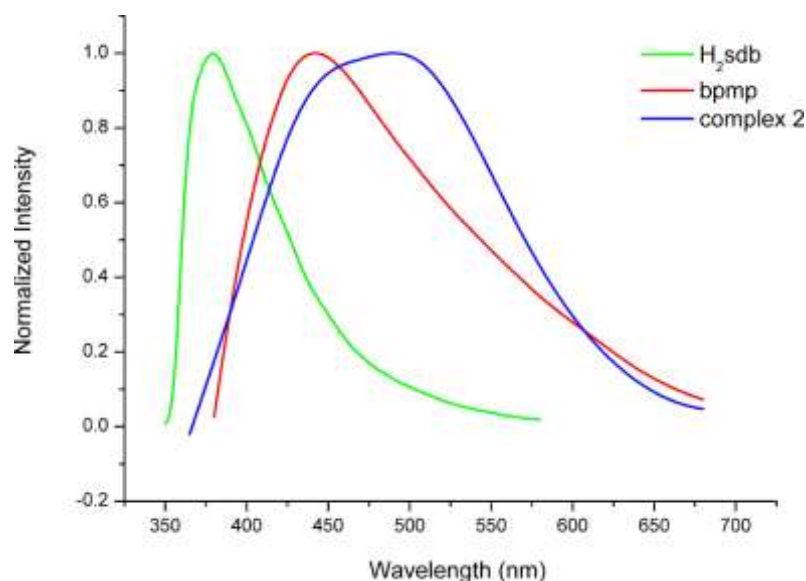

Fig. S10 Solid-state emission spectra of **2**, H<sub>2</sub>sdb and bpmp at room temperature.

Table S1. Selected bond lengths (Å) and angles (°) for complexes **1-2**

| Complex 1   |             |              |             |
|-------------|-------------|--------------|-------------|
| Co1—O1      | 2.045 (3)   | Co2—O2       | 2.080 (3)   |
| Co1—O3      | 2.089 (3)   | Co2—O4       | 2.082 (3)   |
| Co1—O6      | 2.101 (3)   | Co2—O15ii    | 2.137 (3)   |
| Co1—O5      | 2.107 (3)   | Co2—O5       | 2.153 (3)   |
| Co1—N5      | 2.136 (3)   | Co2—N1       | 2.156 (3)   |
| Co1—O10i    | 2.151 (3)   | Co2—N3       | 2.168 (4)   |
| O1—Co1—O3   | 95.28 (14)  | O2—Co2—O4    | 92.04 (13)  |
| O1—Co1—O6   | 174.70 (12) | O2—Co2—O15ii | 174.47 (12) |
| O3—Co1—O6   | 88.19 (13)  | O4—Co2—O15ii | 87.05 (12)  |
| O1—Co1—O5   | 95.01 (12)  | O2—Co2—O5    | 97.49 (12)  |
| O3—Co1—O5   | 85.53 (11)  | O4—Co2—O5    | 89.97 (11)  |
| O6—Co1—O5   | 89.25 (12)  | O15ii—Co2—O5 | 87.97 (11)  |
| O1—Co1—N5   | 85.33 (13)  | O2—Co2—N1    | 89.23 (13)  |
| O3—Co1—N5   | 90.56 (13)  | O4—Co2—N1    | 176.20 (13) |
| O6—Co1—N5   | 90.63 (13)  | O15ii—Co2—N1 | 92.02 (12)  |
| O5—Co1—N5   | 176.10 (12) | O5—Co2—N1    | 86.31 (12)  |
| O1—Co1—O10i | 88.56 (14)  | O2—Co2—N3    | 90.87 (13)  |
| O3—Co1—O10i | 175.44 (13) | O4—Co2—N3    | 91.94 (13)  |
| O6—Co1—O10i | 88.16 (13)  | O15ii—Co2—N3 | 83.72 (13)  |
| O5—Co1—O10i | 91.68 (12)  | O5—Co2—N3    | 171.36 (12) |
| N5—Co1—O10i | 92.21 (13)  | N1—Co2—N3    | 91.62 (13)  |
| Complex 2   |             |              |             |
| Cd1—O1      | 2.2830 (17) | Cd1—Cd2      | 3.4246 (2)  |
| Cd1—O6i     | 2.3076 (16) | Cd2—O8       | 2.2078 (16) |



---

|                |             |                |             |
|----------------|-------------|----------------|-------------|
| Cd1—N1         | 2.3128 (19) | Cd2—O5i        | 2.2183 (16) |
| Cd1—O11i       | 2.3536 (17) | Cd2—N4iii      | 2.350 (2)   |
| Cd1—O7         | 2.3854 (17) | Cd2—N5         | 2.399 (2)   |
| Cd1—O11ii      | 2.5690 (17) | Cd2—O12i       | 2.4038 (16) |
| Cd1—O12i       | 2.5987 (15) | Cd2—O2         | 2.4125 (16) |
| O1—Cd1—O6i     | 80.87 (6)   | O7—Cd1—Cd2     | 57.19 (4)   |
| O1—Cd1—N1      | 85.10 (6)   | O11ii—Cd1—Cd2  | 148.48 (4)  |
| O6i—Cd1—N1     | 154.04 (7)  | O12i—Cd1—Cd2   | 44.46 (3)   |
| O1—Cd1—O11i    | 175.94 (6)  | O8—Cd2—O5i     | 171.58 (6)  |
| O6i—Cd1—O11i   | 102.92 (6)  | O8—Cd2—N4iii   | 92.20 (6)   |
| N1—Cd1—O11i    | 90.84 (6)   | O5i—Cd2—N4iii  | 95.44 (6)   |
| O1—Cd1—O7      | 87.21 (6)   | O8—Cd2—N5      | 88.87 (6)   |
| O6i—Cd1—O7     | 126.77 (6)  | O5i—Cd2—N5     | 95.52 (6)   |
| N1—Cd1—O7      | 73.80 (6)   | N4iii—Cd2—N5   | 83.25 (7)   |
| O11i—Cd1—O7    | 91.57 (6)   | O8—Cd2—O12i    | 92.03 (6)   |
| O1—Cd1—O11ii   | 111.13 (6)  | O5i—Cd2—O12i   | 81.34 (6)   |
| O6i—Cd1—O11ii  | 86.24 (6)   | N4iii—Cd2—O12i | 166.32 (6)  |
| N1—Cd1—O11ii   | 78.57 (6)   | N5—Cd2—O12i    | 83.83 (6)   |
| O11i—Cd1—O11ii | 68.01 (6)   | O8—Cd2—O2      | 95.88 (6)   |
| O7—Cd1—O11ii   | 145.29 (6)  | O5i—Cd2—O2     | 82.16 (6)   |
| O1—Cd1—O12i    | 130.17 (5)  | N4iii—Cd2—O2   | 78.94 (6)   |
| O6i—Cd1—O12i   | 75.85 (5)   | N5—Cd2—O2      | 161.71 (6)  |
| N1—Cd1—O12i    | 129.21 (6)  | O12i—Cd2—O2    | 113.54 (5)  |
| O11i—Cd1—O12i  | 52.89 (5)   | O8—Cd2—Cd1     | 91.80 (4)   |
| O7—Cd1—O12i    | 73.30 (6)   | O5i—Cd2—Cd1    | 79.95 (4)   |
| O11ii—Cd1—O12i | 110.55 (5)  | N4iii—Cd2—Cd1  | 143.55 (5)  |
| O1—Cd1—Cd2     | 86.32 (4)   | N5—Cd2—Cd1     | 133.05 (5)  |
| O6i—Cd1—Cd2    | 70.33 (4)   | O12i—Cd2—Cd1   | 49.22 (4)   |
| N1—Cd1—Cd2     | 130.56 (5)  | O2—Cd2—Cd1     | 64.61 (4)   |
| O11i—Cd1—Cd2   | 96.28 (4)   |                |             |

---

Symmetry code for **1**: (i) -x, -1-y, -z; (ii) 1-x, 1-y, 1-z; symmetry code for **2**: (i) x, 1+y, z; (ii) -x, -y, 2-z; (iii) 1+x, y, -1+z.

## Reference

- 1 Y. Niu, H. Hou, Y. Wei, Y. Fan, Y. Zhu, C. Du and X. Xin, *Inorg. Chem. Commun.*, 2001, **4**, 358-361.
- 2 G. M. Sheldrick, *SHELXS-97, Program for Crystal Structure Solution and Refinement*, 1997, University of Göttingen.
